# Supplementary material for: Two-dimensional silicon phosphide: low effective mass and direct band gap for future devices applications
Source: Springer Nature journal article supplement (doi:10.1007/s10853-019-03753-9), 2019-06-13
Supplement: MOESM1 [file 16808662]

**Electronic supplementary information (ESI)**

**Two-Dimensional Silicon Phosphide: Low Effective Mass and Direct Bandgap for Future Devices Applications**

Shivam Kansara1, Prabal Dev Bhuyan2, Yogesh Sonvane1 and Sanjeev K Gupta2,*

1Advance Materials Lab, Department of Applied Physics, S.V. National Institute of Technology, Surat 395007, India

2Computational Materials and Nanoscience Group, Department of Physics and Electronics, St. Xavier’s College, Ahmedabad 380009, India


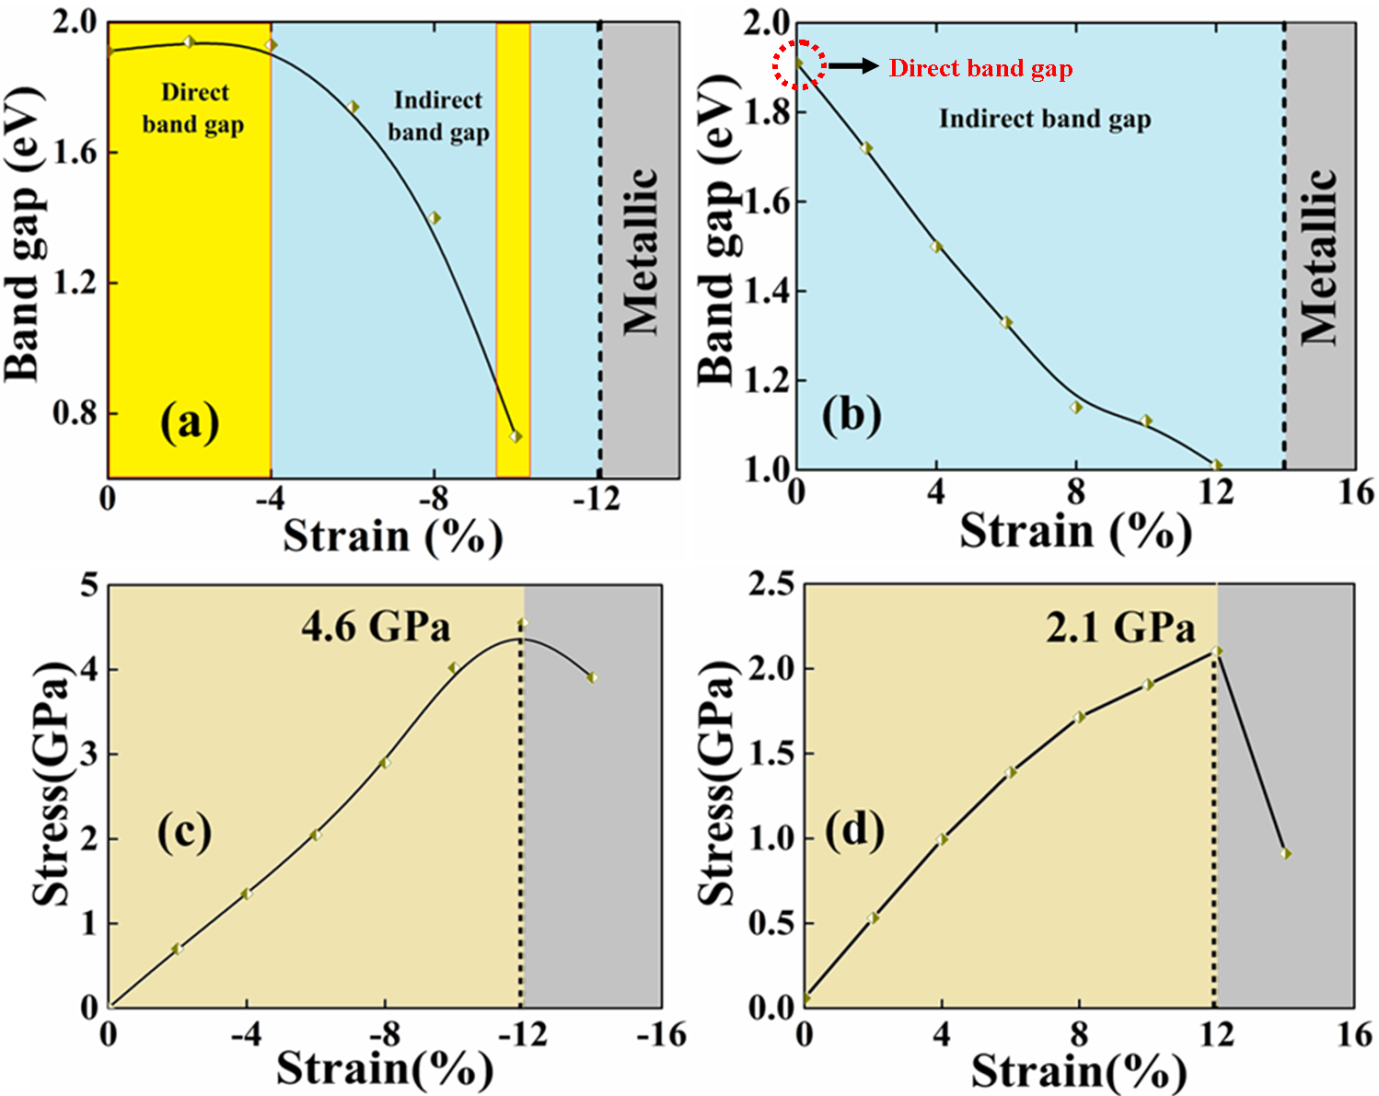


**Reply to Reviewer #1**

**Figure S1:** The variation of band gap with applied (a) compressive strain (b) tensile strain. Under the compressive and tensile strain, the transition of band gap of monolayer SiP from direct to indirect is observed.

**Reply to Reviewer #2**

**Ans-1**


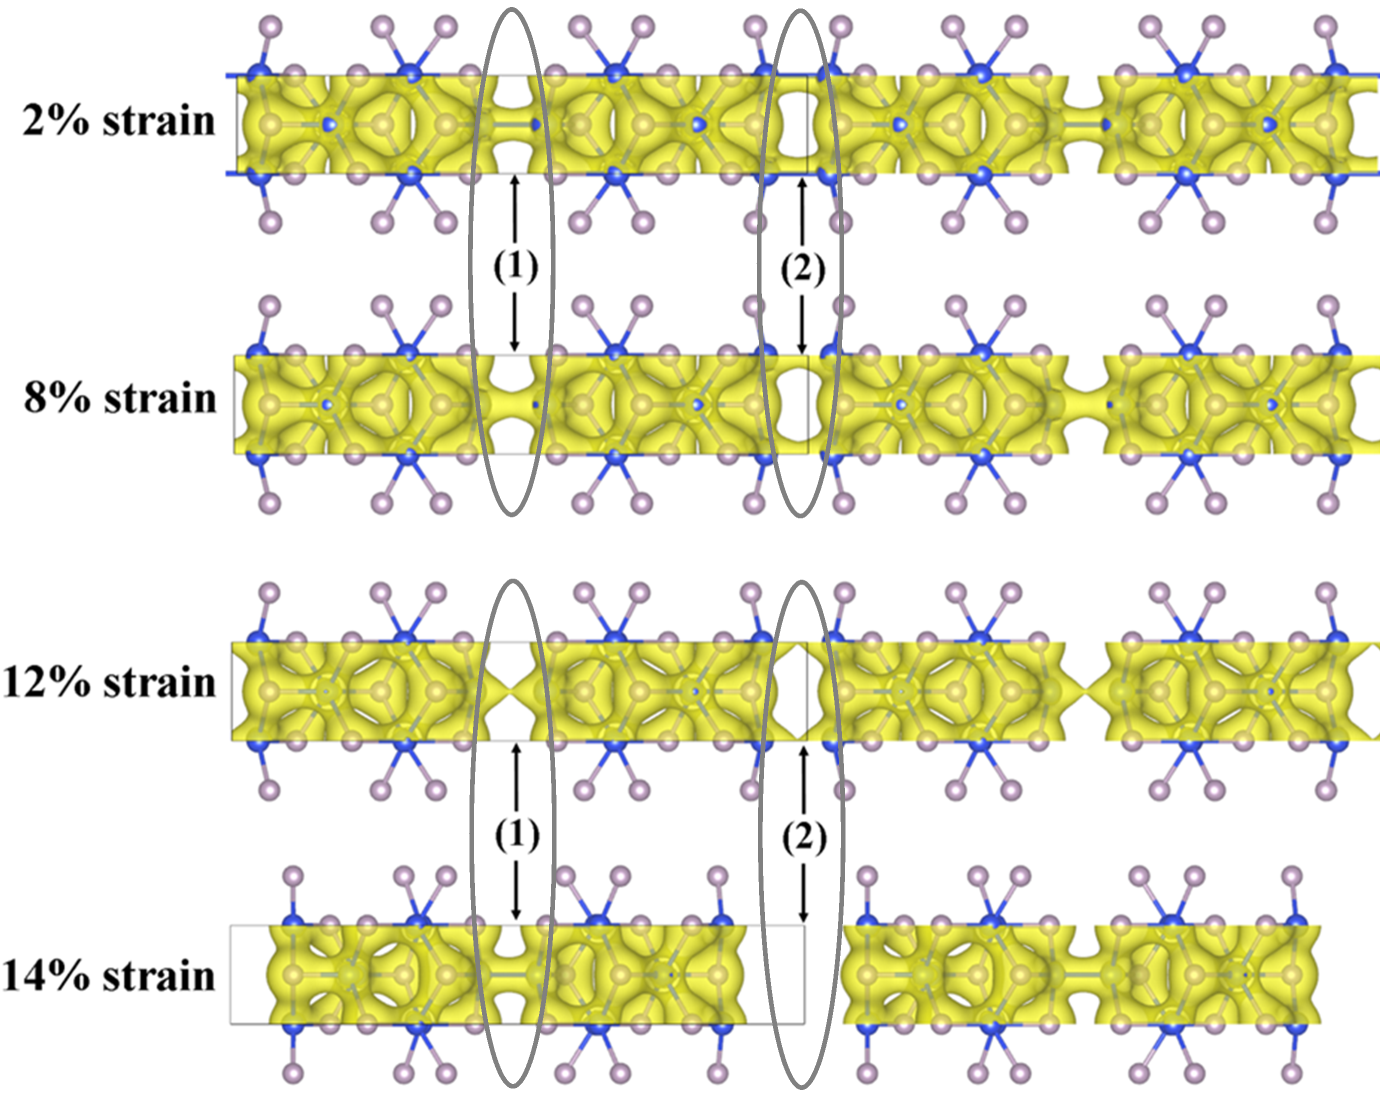


**Figure S2:** Isosurface density plot along the xz plane for the different biaxial strain. Marked (1) and (2) arrows and circles represent the charge transfer from the imaginary ones.
